# Supplementary material for: Hydrothermal-assisted synthesis of the Na7V4(P2O7)4(PO4)/C nanorod and its fast sodium intercalation chemistry in aqueous rechargeable sodium batteries
Source: Royal Society of Chemistry journal article supplement (doi:10.1039/c4nr05175k), 2014-11-10
Supplement: c4nr05175k1.pdf [file c4nr05175k1.pdf]

## Supporting information

### Hydrothermal-assisted Synthesis of $\text{Na}_7\text{V}_4(\text{P}_2\text{O}_7)_4(\text{PO}_4)/\text{C}$ Nanorod and Its Fast Sodium Intercalation Chemistry in Aqueous Rechargeable Sodium Battery

Chao Deng,<sup>\*a</sup> Sen Zhang<sup>\*,b</sup> and Yongxin Wu<sup>a</sup>

<sup>a</sup>Key Laboratory for Photonic and Electronic Bandgap Materials, Ministry of Education; College of Chemistry and Chemical Engineering, Harbin Normal University, Harbin, Heilongjiang, China;

<sup>b</sup>Key Laboratory of Superlight Material and Surface Technology, Ministry of Education; College of Material Science and Chemical Engineering, Harbin Engineering University, Harbin, Heilongjiang, China

Table S1 Atomic parameters of  $\text{Na}_7\text{V}_4(\text{P}_2\text{O}_7)_4(\text{PO}_4)$  determined from XRD pattern ( $R_p=11.07\%$ ,  $R_{wp}=13.70\%$ ,  $\chi^2=2.03$ )

| Atom | Site | x      | y      | z      |
|------|------|--------|--------|--------|
| V1   | 8e   | 0.1214 | 0.1847 | 0.1349 |
| P1   | 8e   | 0.3042 | 0.0444 | 0.1144 |
| P2   | 8e   | 0.2440 | 0.3730 | 0.1253 |
| P3   | 2a   | 0      | 0      | 0      |
| O1   | 8e   | 0.0472 | 0.0584 | 0.1547 |
| O2   | 8e   | 0.3586 | 0.1746 | 0.2003 |
| O3   | 8e   | 0.5042 | 0.2690 | 0.3962 |
| O4   | 8e   | 0.0849 | 0.1880 | 0.4357 |
| O5   | 8e   | 0.2527 | 0.1071 | 0.2451 |
| O6   | 8e   | 0.2990 | 0.3174 | 0.1130 |
| O7   | 8e   | 0.4274 | 0.0909 | 0.0738 |
| O8   | 8e   | 0.1248 | 0.3063 | 0.3081 |
| Na1  | 8e   | 0.5714 | 0.7610 | 0.1201 |
| Na2  | 4d   | 0      | 0.5    | 0.1007 |
| Na3  | 2a   | 0.5    | 0.5    | 0      |
